# Supplementary material for: Unwinding a spiral of cellulose nanocrystals for stimuli-responsive stretchable optics
Source: PubMed Central journal article supplement (PMC6355765; doi:10.1038/s41467-019-08351-6), 2019-01-31
Supplement: 41467_2019_8351_MOESM2_ESM.pdf [file 41467_2019_8351_MOESM2_ESM.pdf]

## **Description of Additional Supplementary Files**

### **Supplementary Movie 1**

Interference color change of CNC-E. Reversible optical property of CNC-E as stress was applied and removed. Polarizers were arranged perpendicular to one another (crossed) and CNC-E was elongated 45° relative to the polarization axis of the polarizer.

### **Supplementary Movie 2**

Quick response of CNC-E to rapid stress application and removal. CNC-E showed rapid and reversible interference color changes when a stress was applied. Polarizers were arranged perpendicular to one another (crossed) and CNC-E was elongated 45° relative to the polarization axis of the polarizer.

### **Supplementary Movie 3**

Extinction and diagonal position of stretched CNC-E. Polarizers were arranged perpendicular to one another (crossed) and CNC-E was stretched along the polarization axis to the extinction position, then rotated 45° to the diagonal position where maximum light transmittance was obtained.

### **Supplementary Movie 4**

Polarized observation of static CNC-E rotating against polarization axis of polarizer. Polarizer and analyzer were arranged perpendicular to one another (crossed) and static CNC-E was rotated.

### **Supplementary Movie 5**

Complementary color of stretched CNC-E viewed under parallel configuration of polarizers. With polarizer and analyzer aligned parallel to one another, stretched CNC-E shows complementary color to that observed when the polarizer and analyzer are perpendicular (crossed) to one another.
